# Supplementary material for: Mapping Vulnerability of Cotton to Climate Change in West Africa: Challenges for Sustainable Development
Source: MDPI journal article supplement (doi:10.3390/cli9040068), 2021-04-19
Supplement: s1 [file s1]

Archive with 1 entries (1 files):
- climate-1180445-SI.pdf
